# Supplementary material for: Synthesis, antitumour and antioxidant activities of novel α,β-unsaturated ketones and related heterocyclic analogues: EGFR inhibition and molecular modelling study
Source: PubMed Central journal article supplement (PMC6010098; doi:10.1080/14756366.2018.1434519), 2018-02-19
Supplement: IENZ_A_1434519_SM4294.pdf [file IENZ_A_1434519_SM4294.pdf]

Researcher : Dr/Magda Abdelaziz email: [Magdaaziz1@yahoo.com](mailto:Magdaaziz1@yahoo.com) mob.01006396439  
 Assay : EGFR enzyme assay  
 Samples : 4 preparations.  
 Date : 18-12-2017  
 Reference : **Sorafinib**  
 Cell line : ---  
 Reader : ROBONIK P2000 ELISA READER wl 450 nm  
 Kit used for immune-assay: *cloud clone SEA757Hu 96 Tests*  
 Solvent : DMSO  
 Assay samples :Cell culture supernatants

## EGFR report

| ser | compound         | M.W    | IC50      | EGFR IC50 uM |
|-----|------------------|--------|-----------|--------------|
| 1   | 6a               | 285.15 | 9.4±0.98  | 4.66         |
| 2   | 6b               | 299.20 | 6.7±0.67  | 0.56         |
| 3   | 7                | 368.25 | 10.3±1.13 | 1.6          |
| 4   | 8b               | 397.00 | 5.5±0.45  | 2.16         |
| 5   | <b>Sorafinib</b> | 393.44 | 0.74±0.03 | 1.28         |

\*Ref=**Sorafinib**

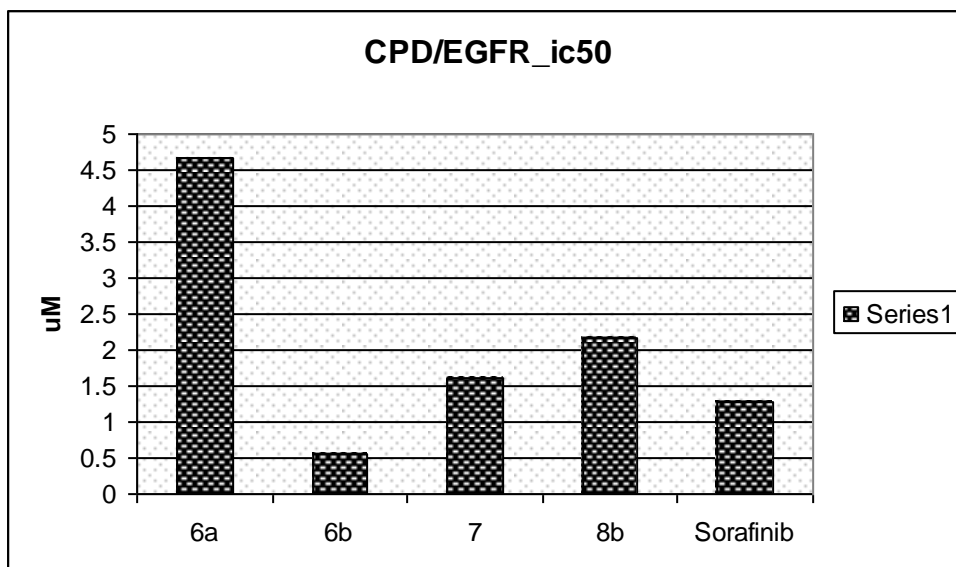

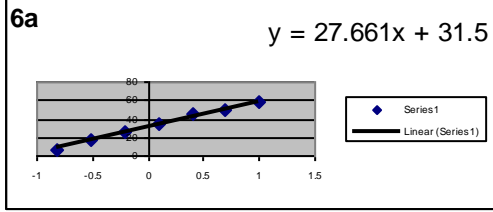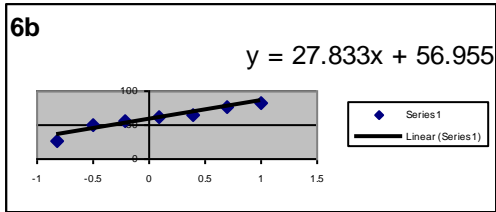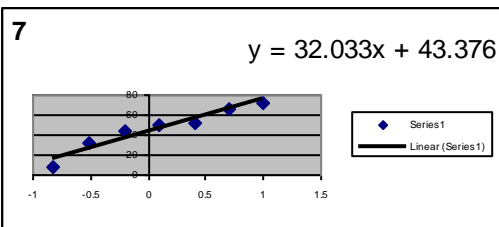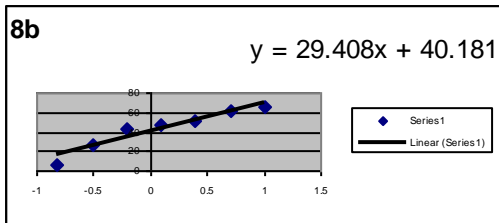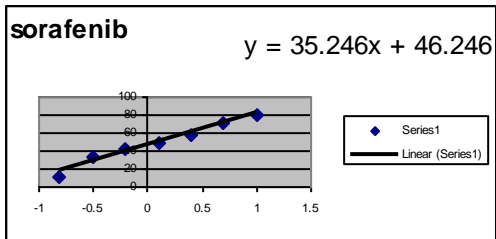

**Detailed Results:**

| ST.  | CONC.ng/ml |
|------|------------|
| St.1 | 200        |
| St.2 | 100        |
| St.3 | 50         |
| St.4 | 25         |
| St.5 | 12.5       |
| St.6 | 6.25       |
| St.7 | 3.12       |
|      |            |

**plate map:**

|   | 1    | 2          | 3          | 4         | 5          | 6           |
|---|------|------------|------------|-----------|------------|-------------|
| A | St.1 | 6a(10uM)   | 6b(10uM)   | 7(10uM)   | 8b(10uM)   | ref(10uM)   |
| B | St.2 | 6a(5uM)    | 6b(5uM)    | 7(5uM)    | 8b(5uM)    | ref(5uM)    |
| C | St.3 | 6a(2.5uM)  | 6b(2.5uM)  | 7(2.5uM)  | 8b(2.5uM)  | ref(2.5uM)  |
| D | St.4 | 6a(1.25uM) | 6b(1.25uM) | 7(1.25uM) | 8b(1.25uM) | ref(1.25uM) |
| E | St.5 | 6a(0.62uM) | 6b(0.62uM) | 7(0.62uM) | 8b(0.62uM) | ref(0.62uM) |
| F | St.6 | 6a(0.31uM) | 6b(0.31uM) | 7(0.31uM) | 8b(0.31uM) | ref(0.31uM) |
| G | St.7 | 6a(0.15uM) | 6b(0.15uM) | 7(0.15uM) | 8b(0.15uM) | ref(0.15uM) |
| H | B    | cont       | cont       | cont      | cont       | cont        |

## Samples OD results

\*I

|   | 1     | 2     | 3     | 4            | 5     | 6            |
|---|-------|-------|-------|--------------|-------|--------------|
| A | 2.746 | 0.708 | 0.257 | <b>0.438</b> | 0.578 | <b>0.296</b> |
| B | 1.133 | 0.836 | 0.372 | <b>0.556</b> | 0.646 | 0.463        |
| C | 0.728 | 0.939 | 0.588 | <b>0.784</b> | 0.826 | 0.715        |
| D | 0.376 | 1.115 | 0.637 | <b>0.843</b> | 0.881 | 0.841        |
| E | 0.115 | 1.261 | 0.741 | 0.955        | 0.937 | 0.957        |
| F | 0.044 | 1.417 | 0.861 | 1.173        | 1.264 | 1.125        |
| G | 0.019 | 1.639 | 1.264 | 1.603        | 1.629 | 1.556        |
| H | 0.005 | 0.008 | 0.003 | 1.771        | 1.759 | 1.779        |

\*\*II

|   | 7     | 8     | 9     | 10           | 11    | 12           |
|---|-------|-------|-------|--------------|-------|--------------|
| A | 2.749 | 0.697 | 0.264 | <b>0.443</b> | 0.574 | <b>0.315</b> |
| B | 1.141 | 0.829 | 0.377 | <b>0.558</b> | 0.651 | 0.457        |
| C | 0.735 | 0.942 | 0.579 | <b>0.791</b> | 0.833 | 0.723        |
| D | 0.384 | 1.124 | 0.642 | <b>0.847</b> | 0.894 | 0.855        |
| E | 0.122 | 1.263 | 0.746 | 0.965        | 0.962 | 0.963        |
| F | 0.048 | 1.433 | 0.854 | 1.168        | 1.282 | 1.137        |
| G | 0.016 | 1.645 | 1.272 | 1.621        | 1.644 | 1.569        |
| H | 0.011 | 0.005 | 0.007 | 1.759        | 1.766 | 1.781        |

|       |       |       |       |       |       |              |              |       |       |              |              |
|-------|-------|-------|-------|-------|-------|--------------|--------------|-------|-------|--------------|--------------|
| 2.746 | 2.749 | 0.708 | 0.697 | 0.257 | 0.264 | <b>0.438</b> | <b>0.443</b> | 0.578 | 0.574 | <b>0.296</b> | <b>0.315</b> |
| 1.133 | 1.141 | 0.836 | 0.829 | 0.372 | 0.377 | <b>0.556</b> | <b>0.558</b> | 0.646 | 0.651 | 0.463        | 0.457        |
| 0.728 | 0.735 | 0.939 | 0.942 | 0.588 | 0.579 | <b>0.784</b> | <b>0.791</b> | 0.826 | 0.833 | 0.715        | 0.723        |
| 0.376 | 0.384 | 1.115 | 1.124 | 0.637 | 0.642 | <b>0.843</b> | <b>0.847</b> | 0.881 | 0.894 | 0.841        | 0.855        |
| 0.115 | 0.122 | 1.261 | 1.263 | 0.741 | 0.746 | 0.955        | 0.965        | 0.937 | 0.962 | 0.957        | 0.963        |
| 0.044 | 0.048 | 1.417 | 1.433 | 0.861 | 0.854 | 1.173        | 1.168        | 1.264 | 1.282 | 1.125        | 1.137        |
| 0.019 | 0.016 | 1.639 | 1.645 | 1.264 | 1.272 | 1.603        | 1.621        | 1.629 | 1.644 | 1.556        | 1.569        |
| 0.005 | 0.011 | 0.008 | 0.005 | 0.003 | 0.007 | 1.771        | 1.759        | 1.759 | 1.766 | 1.779        | 1.781        |

| s         | conc<br>uM | log<br>conc | %inh     | ic50 |
|-----------|------------|-------------|----------|------|
| <b>6a</b> | 10         | 1           | 57.65011 | 4.66 |
|           | 5          | 0.69897     | 50.34841 |      |
|           | 2.5        | 0.39794     | 44.35137 |      |
|           | 1.25       | 0.09691     | 34.55152 |      |
|           | 0.625      | -           | 26.84952 |      |
|           | 0.31       | 0.20761     | -        |      |
|           | 0.15       | -           | 18.1616  |      |
|           | 0.075      | 0.50864     | -        |      |
| <b>6b</b> | 10         | 1           | 83.66197 | 0.56 |
|           | 5          | 0.69897     | 76.71609 |      |
|           | 2.5        | 0.39794     | 64.44774 |      |
|           | 1.25       | 0.09691     | 61.23795 |      |
|           | 0.625      | -           | 55.33729 |      |
|           | 0.31       | 0.20761     | -        |      |
|           | 0.15       | 0.50864     | 48.95478 |      |
|           | 0.075      | -           | 26.52335 |      |
| <b>7</b>  | 10         | 1           | 72.78725 | 1.6  |
|           | 5          | 0.69897     | 65.98221 |      |
|           | 2.5        | 0.39794     | 52.86138 |      |
|           | 1.25       | 0.09691     | 49.65159 |      |
|           | 0.625      | -           | 43.2765  |      |
|           | 0.31       | 0.20761     | -        |      |
|           | 0.15       | 0.50864     | 31.78651 |      |
|           | 0.075      | -           | 8.228317 |      |
| <b>8b</b> | 10         | 1           | 64.8851  | 2.16 |
|           | 5          | 0.69897     | 60.72646 |      |
|           | 2.5        | 0.39794     | 50.51149 |      |
|           | 1.25       | 0.09691     | 47.28688 |      |

|                  |         |          |          |      |
|------------------|---------|----------|----------|------|
| <b>Sorafinib</b> | 0.625   | -        | 43.85471 | 1.28 |
|                  |         | 0.20761  |          |      |
|                  | 0.31    | -        | 26.25649 |      |
|                  |         | 0.50864  |          |      |
|                  | 0.15    | -        | 6.968125 |      |
|                  |         | 0.82391  |          |      |
|                  | 10      | 1        | 80.88955 |      |
|                  | 10      | 0.69897  | 71.63825 |      |
|                  | 5       | 0.39794  | 56.7235  |      |
|                  | 2.5     | 0.09691  | 49.4811  |      |
|                  | 1.25    | -        | 43.2765  |      |
|                  |         | 0.20761  |          |      |
| 0.625            | -       | 33.92884 |          |      |
|                  | 0.50864 |          |          |      |
| 0.31             | -       | 10.82283 |          |      |
|                  | 0.82391 |          |          |      |

| Sample     | Wells | Raw   | Background Corrected | Conc. | Conc. (Average) | %CV   | SD    | SEM    |
|------------|-------|-------|----------------------|-------|-----------------|-------|-------|--------|
| 6a(10uM)   | A3    | 0.708 | 0.696                | 57.55 | 57.13           | 1.04  | 0.594 | 0.42   |
|            | A4    | 0.697 |                      | 56.7  |                 |       |       |        |
| 6a(5uM)    | B3    | 0.836 | 0.826                | 67.25 | 66.98           | 0.556 | 0.373 | 0.263  |
|            | B4    | 0.829 |                      | 66.72 |                 |       |       |        |
| 6a(2.5uM)  | C3    | 0.939 | 0.934                | 74.96 | 75.07           | 0.21  | 0.158 | 0.112  |
|            | C4    | 0.942 |                      | 75.18 |                 |       |       |        |
| 6a(1.25uM) | D3    | 1.12  | 1.11                 | 87.96 | 88.29           | 0.528 | 0.467 | 0.33   |
|            | D4    | 1.12  |                      | 88.62 |                 |       |       |        |
| 6a(0.62uM) | E3    | 1.26  | 1.26                 | 98.61 | 98.68           | 0.104 | 0.103 | 0.0725 |
|            | E4    | 1.26  |                      | 98.75 |                 |       |       |        |
| 6a(0.31uM) | F3    | 1.42  | 1.42                 | 109.9 | 110.4           | 0.735 | 0.812 | 0.574  |
|            | F4    | 1.43  |                      | 111   |                 |       |       |        |
| 6a(0.15uM) | G3    | 1.64  | 1.64                 | 125.7 | 125.9           | 0.239 | 0.301 | 0.213  |
|            | G4    | 1.65  |                      | 126.1 |                 |       |       |        |
| 6b(10uM)   | A5    | 0.257 | 0.254                | 21.75 | 22.04           | 1.88  | 0.414 | 0.293  |
|            | A6    | 0.264 |                      | 22.33 |                 |       |       |        |
| 6b(5uM)    | B5    | 0.372 | 0.368                | 31.21 | 31.41           | 0.911 | 0.286 | 0.202  |
|            | B6    | 0.377 |                      | 31.61 |                 |       |       |        |
| 6b(2.5uM)  | C5    | 0.588 | 0.577                | 48.31 | 47.96           | 1.03  | 0.495 | 0.35   |
|            | C6    | 0.579 |                      | 47.61 |                 |       |       |        |
| 6b(1.25uM) | D5    | 0.637 | 0.633                | 52.1  | 52.29           | 0.521 | 0.272 | 0.193  |
|            | D6    | 0.642 |                      | 52.48 |                 |       |       |        |
| 6b(0.62uM) | E5    | 0.741 | 0.737                | 60.06 | 60.25           | 0.446 | 0.269 | 0.19   |
|            | E6    | 0.746 |                      | 60.44 |                 |       |       |        |
| 6b(0.31uM) | F5    | 0.861 | 0.851                | 69.12 | 68.86           | 0.54  | 0.372 | 0.263  |
|            | F6    | 0.854 |                      | 68.6  |                 |       |       |        |

|             |     |       |       |       |       |       |       |       |
|-------------|-----|-------|-------|-------|-------|-------|-------|-------|
| 6b(0.15uM)  | G5  | 1.26  | 1.26  | 98.83 | 99.12 | 0.414 | 0.41  | 0.29  |
|             | G6  | 1.27  |       | 99.41 |       |       |       |       |
| 7(10uM)     | A7  | 0.438 | 0.434 | 36.51 | 36.71 | 0.768 | 0.282 | 0.199 |
|             | A8  | 0.443 |       | 36.91 |       |       |       |       |
| 7(5uM)      | B7  | 0.556 | 0.551 | 45.82 | 45.89 | 0.24  | 0.11  | 0.078 |
|             | B8  | 0.558 |       | 45.97 |       |       |       |       |
| 7(2.5uM)    | C7  | 0.784 | 0.781 | 63.32 | 63.59 | 0.589 | 0.374 | 0.265 |
|             | C8  | 0.791 |       | 63.85 |       |       |       |       |
| 7(1.25uM)   | D7  | 0.843 | 0.839 | 67.77 | 67.92 | 0.313 | 0.213 | 0.15  |
|             | D8  | 0.847 |       | 68.07 |       |       |       |       |
| 7(0.62uM)   | E7  | 0.955 | 0.954 | 76.15 | 76.52 | 0.687 | 0.526 | 0.372 |
|             | E8  | 0.965 |       | 76.89 |       |       |       |       |
| 7(0.31uM)   | F7  | 1.17  | 1.16  | 92.2  | 92.02 | 0.281 | 0.258 | 0.183 |
|             | F8  | 1.17  |       | 91.84 |       |       |       |       |
| 7(0.15uM)   | G7  | 1.6   | 1.61  | 123.2 | 123.8 | 0.73  | 0.904 | 0.639 |
|             | G8  | 1.62  |       | 124.4 |       |       |       |       |
| 8b(10uM)    | A9  | 0.578 | 0.57  | 47.53 | 47.37 | 0.464 | 0.22  | 0.156 |
|             | A10 | 0.574 |       | 47.22 |       |       |       |       |
| 8b(5uM)     | B9  | 0.646 | 0.642 | 52.79 | 52.98 | 0.514 | 0.272 | 0.192 |
|             | B10 | 0.651 |       | 53.18 |       |       |       |       |
| 8b(2.5uM)   | C9  | 0.826 | 0.823 | 66.49 | 66.76 | 0.558 | 0.373 | 0.264 |
|             | C10 | 0.833 |       | 67.02 |       |       |       |       |
| 8b(1.25uM)  | D9  | 0.881 | 0.881 | 70.62 | 71.11 | 0.967 | 0.688 | 0.486 |
|             | D10 | 0.894 |       | 71.6  |       |       |       |       |
| 8b(0.62uM)  | E9  | 0.937 | 0.943 | 74.81 | 75.74 | 1.74  | 1.32  | 0.93  |
|             | E10 | 0.962 |       | 76.67 |       |       |       |       |
| 8b(0.31uM)  | F9  | 1.26  | 1.27  | 98.83 | 99.48 | 0.927 | 0.923 | 0.652 |
|             | F10 | 1.28  |       | 100.1 |       |       |       |       |
| 8b(0.15uM)  | G9  | 1.63  | 1.63  | 125   | 125.5 | 0.599 | 0.752 | 0.532 |
|             | G10 | 1.64  |       | 126.1 |       |       |       |       |
| ref(10uM)   | A11 | 0.296 | 0.299 | 24.99 | 25.78 | 4.3   | 1.11  | 0.783 |
|             | A12 | 0.315 |       | 26.56 |       |       |       |       |
| ref(5uM)    | B11 | 0.463 | 0.454 | 38.5  | 38.26 | 0.88  | 0.337 | 0.238 |
|             | B12 | 0.457 |       | 38.02 |       |       |       |       |
| ref(2.5uM)  | C11 | 0.715 | 0.713 | 58.08 | 58.38 | 0.739 | 0.431 | 0.305 |
|             | C12 | 0.723 |       | 58.69 |       |       |       |       |
| ref(1.25uM) | D11 | 0.841 | 0.842 | 67.62 | 68.15 | 1.09  | 0.744 | 0.526 |
|             | D12 | 0.855 |       | 68.67 |       |       |       |       |
| ref(0.62uM) | E11 | 0.957 | 0.954 | 76.29 | 76.52 | 0.412 | 0.315 | 0.223 |
|             | E12 | 0.963 |       | 76.74 |       |       |       |       |
| ref(0.31uM) | F11 | 1.13  | 1.12  | 88.69 | 89.13 | 0.697 | 0.622 | 0.44  |
|             | F12 | 1.14  |       | 89.57 |       |       |       |       |

|             |     |       |      |            |       |       |       |       |
|-------------|-----|-------|------|------------|-------|-------|-------|-------|
| ref(0.15uM) | G11 | 1.56  | 1.56 | 119.8      | 120.3 | 0.544 | 0.654 | 0.463 |
|             | G12 | 1.57  |      | 120.7      |       |       |       |       |
| cont        | H7  | 1.77  | 1.76 | 135        | 134.9 | 0.499 | 0.673 | 0.275 |
|             | H8  | 1.76  |      | 134.2      |       |       |       |       |
|             | H9  | 1.76  |      | 134.2      |       |       |       |       |
|             | H10 | 1.77  |      | 134.7      |       |       |       |       |
|             | H11 | 1.78  |      | 135.6      |       |       |       |       |
|             | H12 | 1.78  |      | 135.7      |       |       |       |       |
| Blank       | H1  | 0.005 | 0    | <<br>Curve | -     | -     | -     | -     |
|             | H2  | 0.011 |      | <<br>Curve |       |       |       |       |
|             | H3  | 0.008 |      | <<br>Curve |       |       |       |       |
|             | H4  | 0.005 |      | <<br>Curve |       |       |       |       |
|             | H5  | 0.003 |      | <<br>Curve |       |       |       |       |
|             | H6  | 0.007 |      | <<br>Curve |       |       |       |       |
